# Supplementary material
Source: MDPI journal article supplement (https://www.mdpi.com/2077-0472/14/5/744)
Supplement: s1 [file s1]

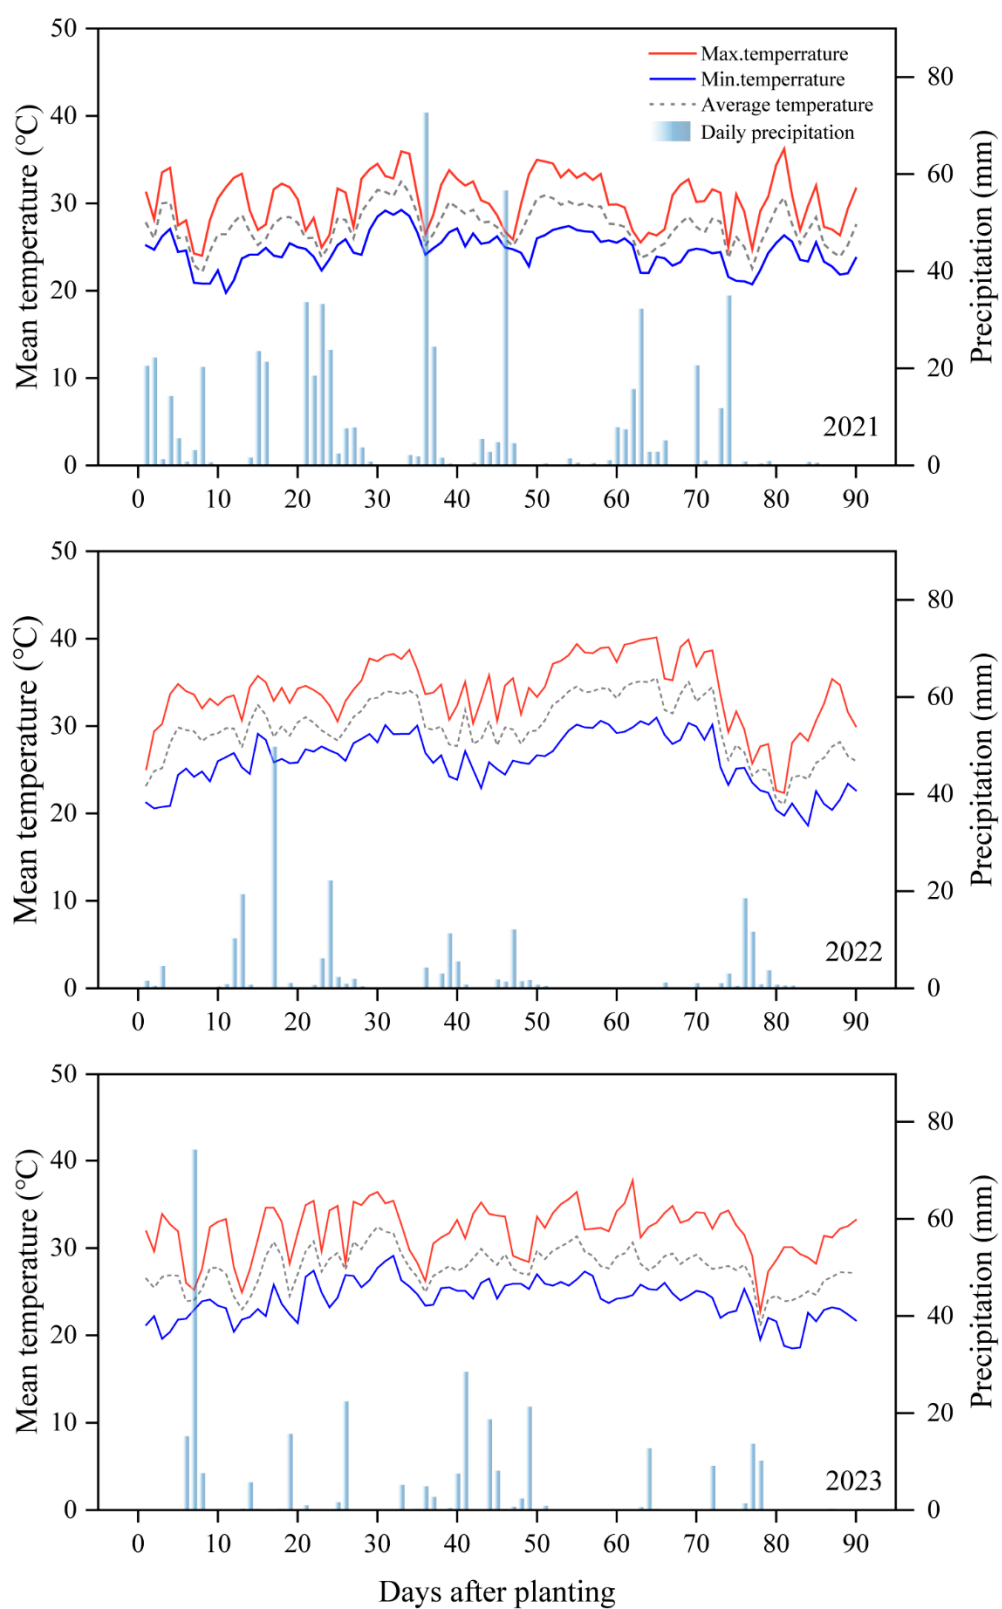

Figure S1. Meteorological data of purple corn planting season (6.12 to 9.09) from 2021 to 2023

Table S1. Meteorological parameters of purple corn growth period from 2021 to 2023

| Year | $\bar{T}_{\max}$ (°C) | $\bar{T}_{\min}$ (°C) | $\bar{T}_{\text{mean}}$ (°C) | Total precipitation (mm) |
|------|-----------------------|-----------------------|------------------------------|--------------------------|
| 2021 | 30.36                 | 24.63                 | 27.41                        | 606.20                   |
| 2022 | 32.98                 | 25.00                 | 28.92                        | 263.47                   |
| 2023 | 31.93                 | 24.08                 | 27.68                        | 293.70                   |

Note:  $\bar{T}_{\max}$ ,  $\bar{T}_{\min}$  and  $\bar{T}_{\text{mean}}$  are the average data of growth period of purple corn, The hourly temperature and precipitation data from hefei meteorological station are provided by Xihe Energy Big Data platform (<https://www.xihe-energy.com/>, accessed on 10 March 2024).
